# Supplementary material
Source: Springer Nature journal article supplement (https://www.springermedizin.de/resource/supplementary/12885_2011_3042_MOESM1_ESM.pdf/9462732)

KI at baseline

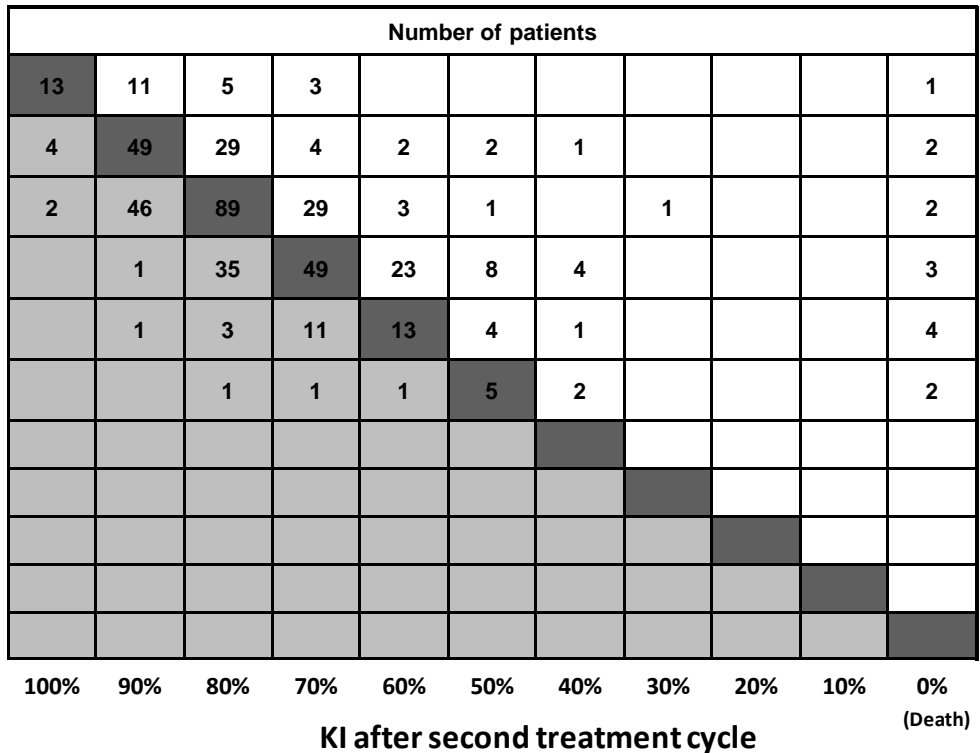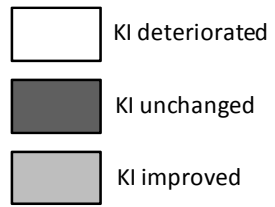

**KI after second treatment cycle** (Death)

Supplement: MOESM1 [file 9462732]
